# Supplementary material
Source: HighWire-hosted journal article supplement (https://www.genetics.org/content/suppl/2017/02/02/genetics.116.197632)
Supplement: TableS3.pdf [file TableS3.pdf]

**Table S3.** Proportion of each type of gamete produced by each descendant genotype in Model II.

| Diploid<br>genotype | Gametes produced |                               |          |                     |                                           |
|---------------------|------------------|-------------------------------|----------|---------------------|-------------------------------------------|
|                     | <i>w</i>         | <i>n</i>                      | <i>e</i> | <i>r</i>            | <i>d</i>                                  |
| <i>ww</i>           | 1                | 0                             | 0        | 0                   | 0                                         |
| <i>wn</i>           | $(1-k_c)/2$      | $1/2+1/2 k_c (1-k_j) (1-k_n)$ | 0        | $(k_c k_j k_r) / 2$ | $1/2 k_c (1-k_j) k_n+1/2 k_c k_j (1-k_r)$ |
| <i>we</i>           | 1/2              | 0                             | 1/2      | 0                   | 0                                         |
| <i>wr</i>           | 1/2              | 0                             | 0        | 1/2                 | 0                                         |
| <i>wd</i>           | 1/2              | 0                             | 0        | 0                   | 1/2                                       |
| <i>nn</i>           | 0                | 1                             | 0        | 0                   | 0                                         |
| <i>ne</i>           | 0                | 1/2                           | 1/2      | 0                   | 0                                         |
| <i>nr</i>           | 0                | 1/2                           | 0        | 1/2                 | 0                                         |
| <i>nd</i>           | 0                | 1/2                           | 0        | 0                   | 1/2                                       |
| <i>ee</i>           | 0                | 0                             | 1        | 0                   | 0                                         |
| <i>er</i>           | 0                | 0                             | 1/2      | 1/2                 | 0                                         |
| <i>ed</i>           | 0                | 0                             | 1/2      | 0                   | 1/2                                       |
| <i>rr</i>           | 0                | 0                             | 0        | 1                   | 0                                         |
| <i>rd</i>           | 0                | 0                             | 0        | 1/2                 | 1/2                                       |
| <i>dd</i>           | 0                | 0                             | 0        | 0                   | 1                                         |
