# Supplementary material
Source: HighWire-hosted journal article supplement (https://www.genetics.org/content/suppl/2017/02/02/genetics.116.197632)
Supplement: TableS4.pdf [file TableS4.pdf]

**Table S4.** Fitness and proportion of each type of gamete produced for each original genotype in Model II (proportions calculated from Tables S2 and S3).

| Diploid genotype | Fitness                               | Gametes produced                   |                                                    |             |                                     |                                                               |
|------------------|---------------------------------------|------------------------------------|----------------------------------------------------|-------------|-------------------------------------|---------------------------------------------------------------|
|                  |                                       | <i>w</i>                           | <i>n</i>                                           | <i>e</i>    | <i>r</i>                            | <i>d</i>                                                      |
| <i>ww</i>        | 1                                     | $1-m_w$                            | 0                                                  | 0           | 0                                   | $m_w$                                                         |
| <i>wn</i>        | $(1-h_d s_d) (1-h_n s_n)$             | $-(1/2) (1+k_c (-1+m_n)) (-1+m_w)$ | $1/2 (-1+m_n) (-1+k_c (-1+k_j) (-1+k_n) (-1+m_w))$ | 0           | $1/2 k_c k_j k_r (-1+m_n) (-1+m_w)$ | $1/2 (m_n-k_c (-k_n+k_j (-1+k_n+k_r))) (-1+m_n) (-1+m_w)+m_w$ |
| <i>we</i>        | $(1-h_e s_e)$                         | $(1-m_w)/2$                        | 0                                                  | $(1-m_e)/2$ | $m_e/2$                             | $m_w/2$                                                       |
| <i>wr</i>        | 1                                     | $(1-m_w)/2$                        | 0                                                  | 0           | $(1-m_w)/2$                         | $m_w$                                                         |
| <i>wd</i>        | $(1-h_d s_d)$                         | $(1-m_w)/2$                        | 0                                                  | 0           | 0                                   | $(1+m_w)/2$                                                   |
| <i>nn</i>        | $(1-s_d) (1-s_n)$                     | 0                                  | $1-m_n$                                            | 0           | 0                                   | $m_n$                                                         |
| <i>ne</i>        | $(1-h_d s_d) (1-h_n s_n) (1-h_e s_e)$ | 0                                  | $(1-m_n)/2$                                        | $(1-m_e)/2$ | $m_e/2$                             | $m_n/2$                                                       |
| <i>nr</i>        | $(1-h_d s_d) (1-h_n s_n)$             | 0                                  | $(1-m_n)/2$                                        | 0           | $(1-m_w)/2$                         | $(m_n+m_w)/2$                                                 |
| <i>nd</i>        | $(1-s_d) (1-h_n s_n)$                 | 0                                  | $(1-m_n)/2$                                        | 0           | 0                                   | $(1+m_n)/2$                                                   |
| <i>ee</i>        | $(1-s_e)$                             | 0                                  | 0                                                  | $1-m_e$     | $m_e$                               | 0                                                             |
| <i>er</i>        | $(1-h_e s_e)$                         | 0                                  | 0                                                  | $(1-m_e)/2$ | $1/2 (1+m_e-m_w)$                   | $m_w/2$                                                       |
| <i>ed</i>        | $(1-h_e s_e)(1-h_d s_d)$              | 0                                  | 0                                                  | $(1-m_e)/2$ | $m_e/2$                             | $1/2$                                                         |
| <i>rr</i>        | 1                                     | 0                                  | 0                                                  | 0           | $1-m_w$                             | $m_w$                                                         |
| <i>rd</i>        | $(1-h_d s_d)$                         | 0                                  | 0                                                  | 0           | $(1-m_w)/2$                         | $(1+m_w)/2$                                                   |
| <i>dd</i>        | $(1-s_d)$                             | 0                                  | 0                                                  | 0           | 0                                   | 1                                                             |
